# Supplementary material for: Comparative Study on Foaming Properties of Egg White with Yolk Fractions and Their Hydrolysates
Source: MDPI journal article supplement (doi:10.3390/foods10092238), 2021-09-21
Supplement: s1 [file s1]

Article

# Comparative Study on Foaming Properties of Egg White with Yolk Fractions and Their Hydrolysates

Xin Li <sup>1,\*</sup>, Yue-Meng Wang <sup>2</sup>, Cheng-Feng Sun <sup>1</sup>, Jian-Hao Lv <sup>1</sup> and Yan-Jun Yang <sup>3</sup>

<sup>1</sup> School of Life Sciences, Yantai University, Yantai 264005, China; cfsun@ytu.edu.cn (C.-F.S.); ljh17853509809@163.com (J.-H.L.)

<sup>2</sup> School of Food and Biological Engineering, Yantai Institute of Technology, Yantai 264003, China; wangym0523@163.com

<sup>3</sup> School of Food Science, Jiangnan University, Wuxi 214122, China; yanjunyangx@126.com

\* Correspondence: nallyxin@163.com

## Supplementary Materials:

**Citation:** Li, X.; Wang, Y.-M.; Sun, C.-F.; Lv, J.-H.; Yang, Y.-J. Comparative Study on Foaming Properties of Egg White with Yolk Fractions and Their Hydrolysates. *Foods* **2021**, *10*, 2238. <https://doi.org/10.3390/foods10092238>

Academic Editor: Susana Casal

Received: 26 August 2021

Accepted: 17 September 2021

Published: 21 September 2021

**Publisher's Note:** MDPI stays neutral with regard to jurisdictional claims in published maps and institutional affiliations.

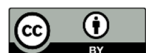

**Copyright:** © 2021 by the authors. Licensee MDPI, Basel, Switzerland. This article is an open access article distributed under the terms and conditions of the Creative Commons Attribution (CC BY) license (<http://creativecommons.org/licenses/by/4.0/>).

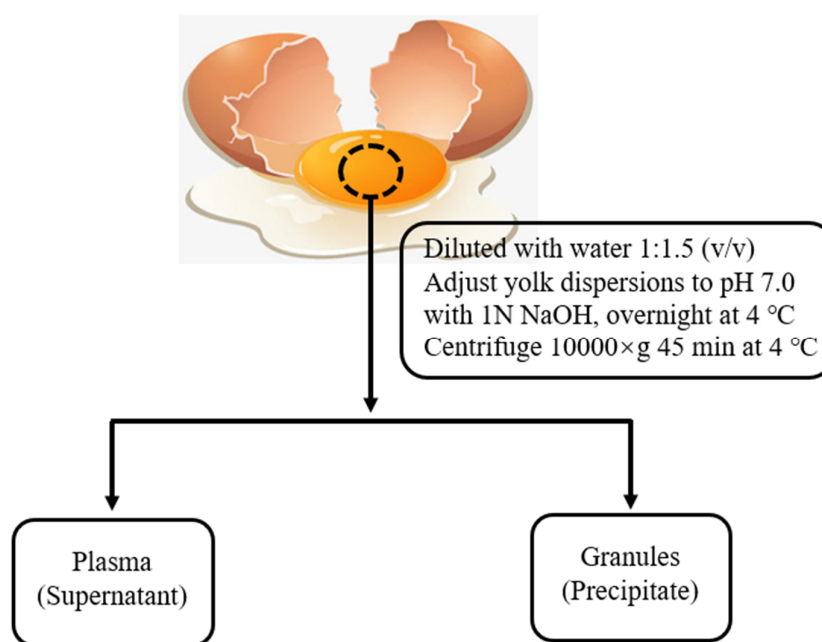

**Figure S1.** The preparation of egg yolk fractions (plasma and granules).
